# Supplementary material for: Safety and immunogenicity of novel 5T4 viral vectored vaccination regimens in early stage prostate cancer: a phase I clinical trial
Source: PubMed Central journal article supplement — J Immunother Cancer. 2020 Jun 25;8(1):e000928. doi: 10.1136/jitc-2020-000928 (PMC7319775; doi:10.1136/jitc-2020-000928), 2020-06-25
Supplement: jitc-2020-000928supp001.pdf [file jitc-2020-000928supp001.pdf]

## Supplementary Materials

### Materials and methods

#### *Ex vivo IFN- $\gamma$ ELISpot on CD4+ and CD8+ T cell depleted PBMCs*

Cryopreserved PBMCs from selected patients were rapidly thawed and incubated at 37 °C for at least 1 hour in RPMI medium (Sigma) and benzonase (Merck Chemicals Ltd) prior to the test. Cells were counted and divided for CD4+ and CD8+ T cell depletion protocols (Miltenyi Biotec Ltd), as well as for the whole PBMCs fraction test. Following the depletion procedure as per manufacturer instructions, both unfractionated and depleted PBMCs were plated at  $2.5 \times 10^5$  cells per well as per ex vivo IFN- $\gamma$  ELISpot assay described in Materials and Methods. Stimulation of all fractions was performed with patient-specific pools of 5T4 peptides which elicited a response in freshly isolated cells, with the exception of the non-responder patient, whose cell fractions were stimulated with the total pool of 5T4 peptides.

#### *Semi-quantitative ELISA*

5T4- and MVA-specific antibody responses were measured using a validated semi-quantitative ELISA. Polyclonal plasma, known to be positive for both 5T4 and MVA antibodies, was used as a standard curve for each assay. The standard curves for each ELISA were assigned a nominal value of 5T4 or MVA antibody relative units (RU) and were titrated from 200 to 1.56 RU. A cut-point was established for each assay by analysing 5T4- and MVA-specific antibody levels in plasma recovered from 50 healthy donors. Cut-points of 11.17 RU and 5.00 RU were established for 5T4 and MVA, respectively. Variation in the level of 5T4 and MVA antibody levels was assessed in cancer patients who had not received any 5T4- or MVA-targeted therapies. A 1.54-fold increase in 5T4 antibody and a 1.76-fold

increase in MVA antibody were established as the level at which a 1% false positive rate could be expected. A positive response was reported if the post-vaccination antibody levels exceeded the cut-point and the increase, relative to the baseline, exceeded the predetermined fold increase for each antigen.

## Figures

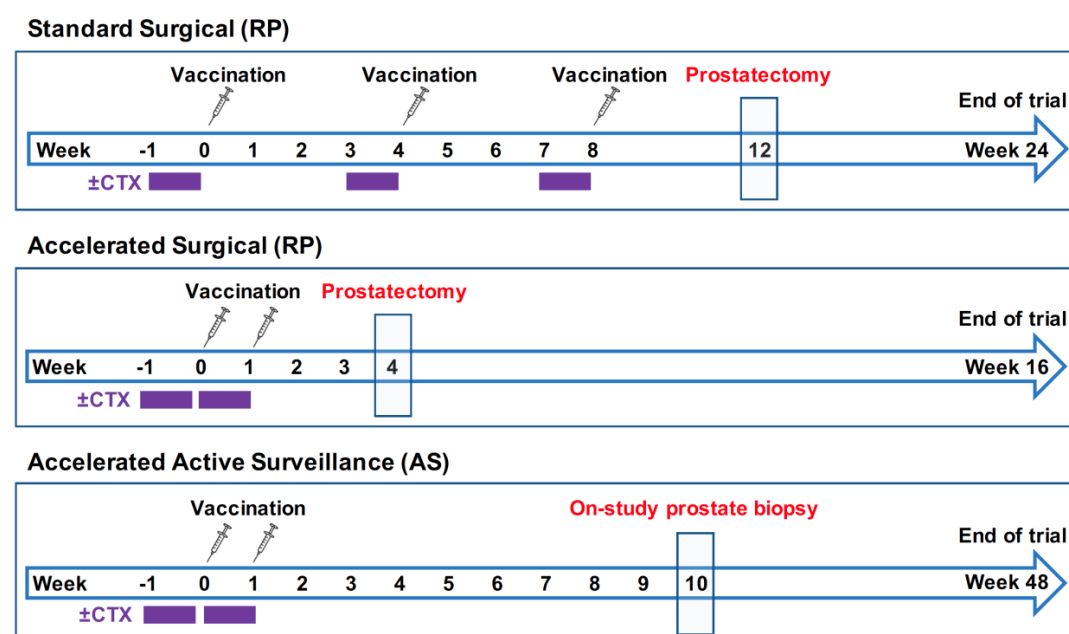

**Figure S1. VANCE study design.** Study treatment schedule in the three vaccination regimens. RP: radical prostatectomy; AS: active surveillance; CTX: cyclophosphamide.

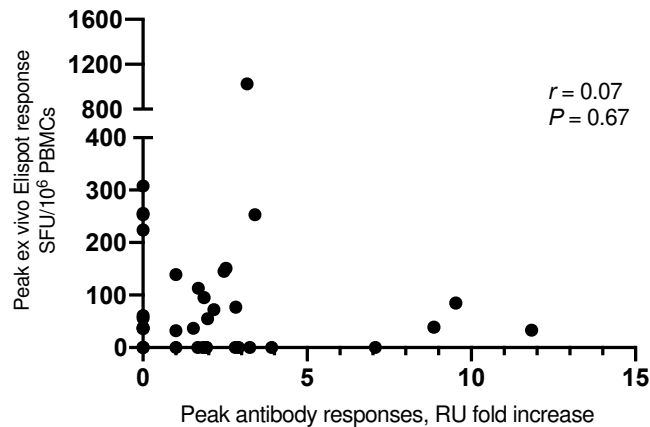

**Figure S2. Correlation analysis of vaccination induced T cell and antibody responses.**

Two-tailed Spearman's correlation of peak T cell and antibody responses.

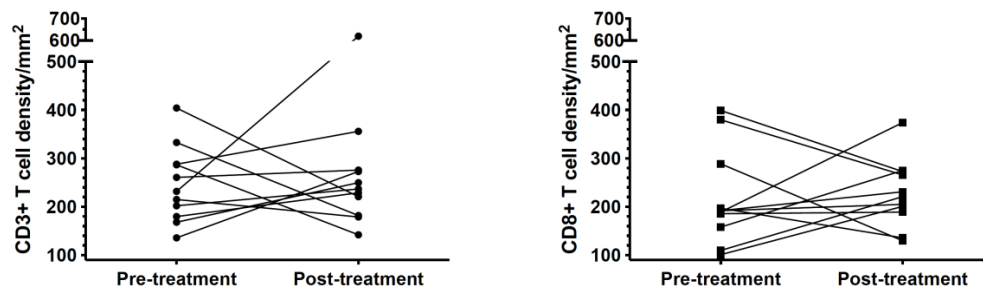

**Figure S3. T cell infiltration in the prostate gland of vaccinated active surveillance patients.** Archived diagnostic prostate biopsies and matched on study biopsies collected at week 10 from patients in the active surveillance arms were tested for T cell infiltration by immunohistochemistry. Formalin-fixed paraffin-embedded sections were stained with anti-CD3 and anti-CD8 antibodies and cell densities were calculated. Comparison of CD3+ (left) and CD8+ (right) T cell densities, expressed as number of cells per mm<sup>2</sup>.

## Tables

**Table S1.** Antibody panel for flow cytometry staining of stimulated cultured PBMCs and TILs.

| Antibody       | Fluorophore | Clone  | Supplier              | Cat Nr     |
|----------------|-------------|--------|-----------------------|------------|
| Zombie NIR Dye | Near IR     |        | Life Technologies Ltd | L10119     |
| CD3            | AF700       | UCHT1  | eBioscience           | 56-0038-82 |
| CD4            | APC         | RPA-T4 | eBioscience           | 17-0049-42 |
| CD8a           | eFluor450   | RPA-T8 | eBioscience           | 48-0088-42 |
| IFN- $\gamma$  | FITC        | 4S.B3  | eBioscience           | 11-7319-82 |
| IFN- $\gamma$  | PE          | 4S.B3  | Life Technologies Ltd | 12-7319-82 |
| TNF- $\alpha$  | FITC        | MAb11  | Life Technologies Ltd | 11-7349-82 |
| TNF- $\alpha$  | PE          | MAb11  | eBioscience           | 12-7349-82 |

**Table S2.** Baseline demographics and disease characteristics of VANCE study.

|                                   | Radical prostatectomy arms   |                                 | Active surveillance arms        |
|-----------------------------------|------------------------------|---------------------------------|---------------------------------|
|                                   | Standard vaccination regimen | Accelerated vaccination regimen | Accelerated vaccination regimen |
| <b>Number of patients (n)</b>     | 11                           | 16                              | 13                              |
| <b>Median age / range (years)</b> | 63 / 53-73                   | 58 / 50-75                      | 69 / 53-77                      |
| <b>Gleason score (n)</b>          |                              |                                 |                                 |
| >6                                | 0                            | 1                               | 10                              |
| <i>High volume 6</i>              | 0                            | 1                               | 1                               |
| 3+4                               | 8                            | 11                              | 2                               |
| 4+3                               | 3                            | 3                               | 0                               |
| <b>Clinical stage (n)</b>         |                              |                                 |                                 |
| $\geq T1c$                        | 3                            | 2                               | 13                              |
| <i>T2a</i>                        | 2                            | 7                               | 0                               |
| <i>T2b</i>                        | 6                            | 7                               | 0                               |

**Table S3.** 5T4- and MVA-specific antibody responses in plasma of vaccinated patients.

| Patient ID | Group | Timepoint (week) | 5T4 antibody (RU) | Response | MVA antibody (RU) | Response |
|------------|-------|------------------|-------------------|----------|-------------------|----------|
| VAN-001    | 4     | 0                | 27.23             | N/A      | 7.39              | N/A      |
| VAN-001    |       | 2                | 29.05             | Negative | 10.15             | Negative |
| VAN-001    |       | 4                | 25.01             | Negative | 13.03             | Positive |
| VAN-001    |       | 5                | 51.88             | Positive | 125.99            | Positive |
| VAN-001    |       | 8                | 44.90             | Positive | 116.84            | Positive |
| VAN-001    |       | 9                | 48.14             | Positive | 125.77            | Positive |
| VAN-001    |       | 12               | 47.41             | Positive | 108.15            | Positive |
| VAN-001    |       | 24               | 35.21             | Negative | 52.70             | Positive |
| VAN-002    | 3     | 0                | 20.33             | N/A      | 8.56              | N/A      |
| VAN-002    |       | 2                | 17.91             | Negative | 65.44             | Positive |
| VAN-002    |       | 4                | 25.12             | Negative | 57.50             | Positive |
| VAN-002    |       | 5                | 37.28             | Positive | 70.88             | Positive |
| VAN-002    |       | 8                | 36.18             | Positive | 64.30             | Positive |
| VAN-002    |       | 9                | 30.35             | Negative | 50.63             | Positive |
| VAN-002    |       | 12               | 29.31             | Negative | 43.20             | Positive |
| VAN-002    |       | 24               | 14.09             | Negative | 34.55             | Positive |
| VAN-003    | 2     | 0                | 19.22             | N/A      | 5.22              | N/A      |
| VAN-003    |       | 2                | 30.90             | Positive | 8.23              | Negative |
| VAN-003    |       | 4                | 31.77             | Positive | 8.53              | Negative |
| VAN-003    |       | 5                | 32.10             | Positive | 42.79             | Positive |
| VAN-003    |       | 8                | 25.89             | Negative | 72.23             | Positive |
| VAN-003    |       | 9                | 30.14             | Positive | 79.45             | Positive |
| VAN-003    |       | 12               | 47.49             | Positive | 79.91             | Positive |
| VAN-003    |       | 24               | 24.22             | Negative | 55.76             | Positive |
| VAN-004    | 1     | 0                | 43.21             | N/A      | 6.48              | N/A      |
| VAN-004    |       | 2                | 44.39             | Negative | 6.23              | Negative |
| VAN-004    |       | 4                | 48.02             | Negative | 9.23              | Negative |
| VAN-004    |       | 5                | 46.49             | Negative | 27.11             | Positive |
| VAN-004    |       | 8                | 48.14             | Negative | 62.50             | Positive |
| VAN-004    |       | 9                | 85.00             | Positive | 98.95             | Positive |
| VAN-004    |       | 12               | 81.46             | Positive | 71.63             | Positive |
| VAN-004    |       | 24               | 35.25             | Negative | 40.24             | Positive |
| VAN-005    | 6     | 0                | 28.52             | N/A      | 11.70             | N/A      |
| VAN-005    |       | 1                | 28.94             | Negative | 10.23             | Negative |
| VAN-005    |       | 2                | 40.82             | Negative | 70.87             | Positive |

|                |          |           |        |          |        |          |
|----------------|----------|-----------|--------|----------|--------|----------|
| <b>VAN-005</b> |          | <b>4</b>  | 42.11  | Negative | 223.65 | Positive |
| <b>VAN-005</b> |          | <b>17</b> | 61.56  | Positive | 122.79 | Positive |
| <b>VAN-006</b> | <b>8</b> | <b>0</b>  | 22.20  | N/A      | <5     | N/A      |
| <b>VAN-006</b> |          | <b>1</b>  | 18.85  | Negative | <5     | Negative |
| <b>VAN-006</b> |          | <b>2</b>  | 20.27  | Negative | <5     | Negative |
| <b>VAN-006</b> |          | <b>4</b>  | 23.84  | Negative | 11.77  | Positive |
| <b>VAN-006</b> |          | <b>8</b>  | 22.89  | Negative | 9.25   | Positive |
| <b>VAN-006</b> |          | <b>10</b> | 22.61  | Negative | 8.62   | Negative |
| <b>VAN-006</b> |          | <b>22</b> | 19.99  | Negative | 5.06   | Negative |
| <b>VAN-006</b> |          | <b>34</b> | 19.03  | Negative | <5     | Negative |
| <b>VAN-006</b> |          | <b>48</b> | 34.31  | Negative | <5     | Negative |
| <b>VAN-007</b> | <b>7</b> | <b>0</b>  | 12.80  | N/A      | <5     | N/A      |
| <b>VAN-007</b> |          | <b>1</b>  | 12.80  | Negative | <5     | Negative |
| <b>VAN-007</b> |          | <b>2</b>  | 14.14  | Negative | 10.67  | Positive |
| <b>VAN-007</b> |          | <b>4</b>  | 38.19  | Positive | 24.90  | Positive |
| <b>VAN-007</b> |          | <b>8</b>  | 40.57  | Positive | 18.39  | Positive |
| <b>VAN-007</b> |          | <b>10</b> | 38.46  | Positive | 14.81  | Positive |
| <b>VAN-007</b> |          | <b>22</b> | 19.95  | Positive | 12.53  | Positive |
| <b>VAN-007</b> |          | <b>34</b> | 13.98  | Negative | 8.75   | Negative |
| <b>VAN-007</b> |          | <b>48</b> | 14.21  | Negative | 7.26   | Negative |
| <b>VAN-008</b> | <b>2</b> | <b>0</b>  | 30.16  | N/A      | 8.13   | N/A      |
| <b>VAN-008</b> |          | <b>2</b>  | 27.19  | Negative | 9.94   | Negative |
| <b>VAN-008</b> |          | <b>4</b>  | 27.63  | Negative | 9.48   | Negative |
| <b>VAN-008</b> |          | <b>5</b>  | 30.81  | Negative | 8.51   | Negative |
| <b>VAN-008</b> |          | <b>8</b>  | 91.41  | Positive | 31.50  | Positive |
| <b>VAN-008</b> |          | <b>9</b>  | 357.00 | Positive | 127.25 | Positive |
| <b>VAN-008</b> |          | <b>12</b> | 273.81 | Positive | 98.64  | Positive |
| <b>VAN-008</b> |          | <b>24</b> | 79.14  | Positive | 27.22  | Positive |
| <b>VAN-010</b> | <b>6</b> | <b>0</b>  | 18.39  | N/A      | 9.10   | N/A      |
| <b>VAN-010</b> |          | <b>1</b>  | 19.16  | Negative | 5.58   | Negative |
| <b>VAN-010</b> |          | <b>2</b>  | 19.59  | Negative | 17.62  | Positive |
| <b>VAN-010</b> |          | <b>4</b>  | 20.26  | Negative | 28.82  | Positive |
| <b>VAN-010</b> |          | <b>16</b> | 31.07  | Positive | 47.25  | Positive |
| <b>VAN-011</b> | <b>3</b> | <b>0</b>  | 26.85  | N/A      | <5     | N/A      |
| <b>VAN-011</b> |          | <b>2</b>  | 27.39  | Negative | 70.36  | Positive |
| <b>VAN-011</b> |          | <b>4</b>  | 36.81  | Negative | 61.80  | Positive |
| <b>VAN-011</b> |          | <b>5</b>  | 143.44 | Positive | 46.99  | Positive |
| <b>VAN-011</b> |          | <b>8</b>  | 136.85 | Positive | 89.78  | Positive |

|                |          |           |        |          |        |          |
|----------------|----------|-----------|--------|----------|--------|----------|
| <b>VAN-011</b> |          | <b>9</b>  | 175.45 | Positive | 95.62  | Positive |
| <b>VAN-011</b> |          | <b>12</b> | 164.23 | Positive | 133.75 | Positive |
| <b>VAN-011</b> |          | <b>24</b> | 64.25  | Positive | 76.67  | Positive |
| <b>VAN-012</b> | <b>5</b> | <b>0</b>  | 14.61  | N/A      | <5     | N/A      |
| <b>VAN-012</b> |          | <b>1</b>  | 14.91  | Negative | <5     | Negative |
| <b>VAN-012</b> |          | <b>2</b>  | 16.23  | Negative | 9.32   | Positive |
| <b>VAN-012</b> |          | <b>4</b>  | 18.09  | Negative | 105.44 | Positive |
| <b>VAN-012</b> |          | <b>16</b> | 22.49  | Positive | 35.44  | Positive |
| <b>VAN-013</b> | <b>7</b> | <b>0</b>  | 47.48  | N/A      | <5     | Negative |
| <b>VAN-013</b> |          | <b>1</b>  | 45.04  | Negative | <5     | N/A      |
| <b>VAN-013</b> |          | <b>2</b>  | 44.96  | Negative | <5     | Negative |
| <b>VAN-013</b> |          | <b>4</b>  | 45.70  | Negative | 10.09  | Positive |
| <b>VAN-013</b> |          | <b>8</b>  | 48.87  | Negative | 10.99  | Positive |
| <b>VAN-013</b> |          | <b>22</b> | 60.93  | Negative | 7.35   | Negative |
| <b>VAN-013</b> |          | <b>34</b> | 47.65  | Negative | 5.49   | Negative |
| <b>VAN-013</b> |          | <b>48</b> | 52.92  | Negative | 5.60   | Negative |
| <b>VAN-015</b> | <b>8</b> | <b>0</b>  | 14.84  | N/A      | 7.01   | Negative |
| <b>VAN-015</b> |          | <b>1</b>  | 14.76  | Negative | 7.86   | Negative |
| <b>VAN-015</b> |          | <b>2</b>  | 14.65  | Negative | 35.01  | Positive |
| <b>VAN-015</b> |          | <b>4</b>  | 19.88  | Negative | 161.63 | Positive |
| <b>VAN-015</b> |          | <b>8</b>  | 28.73  | Positive | 103.58 | Positive |
| <b>VAN-015</b> |          | <b>22</b> | 18.86  | Negative | 78.50  | Positive |
| <b>VAN-015</b> |          | <b>34</b> | 16.08  | Negative | 68.74  | Positive |
| <b>VAN-015</b> |          | <b>48</b> | 18.36  | Negative | 53.43  | Positive |
| <b>VAN-016</b> | <b>8</b> | <b>0</b>  | 5.78   | N/A      | <5     | N/A      |
| <b>VAN-016</b> |          | <b>1</b>  | 5.78   | Negative | <5     | Negative |
| <b>VAN-016</b> |          | <b>2</b>  | 6.38   | Negative | 28.77  | Positive |
| <b>VAN-016</b> |          | <b>4</b>  | 11.74  | Positive | 171.66 | Positive |
| <b>VAN-016</b> |          | <b>8</b>  | 19.72  | Positive | 194.35 | Positive |
| <b>VAN-016</b> |          | <b>22</b> | 12.68  | Positive | 135.41 | Positive |
| <b>VAN-016</b> |          | <b>34</b> | 8.81   | Negative | 107.05 | Positive |
| <b>VAN-016</b> |          | <b>48</b> | 8.09   | Negative | 83.54  | Positive |
| <b>VAN-018</b> | <b>8</b> | <b>0</b>  | 10.67  | Negative | <5     | Negative |
| <b>VAN-018</b> |          | <b>1</b>  | 11.36  | Negative | <5     | Negative |
| <b>VAN-018</b> |          | <b>2</b>  | 12.81  | Negative | <5     | Negative |
| <b>VAN-018</b> |          | <b>4</b>  | 11.17  | Negative | <5     | Negative |
| <b>VAN-018</b> |          | <b>8</b>  | 13.40  | Negative | <5     | Negative |
| <b>VAN-018</b> |          | <b>22</b> | 20.73  | Positive | <5     | Negative |

|                |          |           |       |          |        |          |
|----------------|----------|-----------|-------|----------|--------|----------|
| <b>VAN-018</b> |          | <b>34</b> | 19.22 | Positive | <5     | Negative |
| <b>VAN-018</b> |          | <b>48</b> | 34.63 | Positive | <5     | Negative |
| <b>VAN-019</b> | <b>8</b> | <b>0</b>  | 31.63 | N/A      | 18.54  | N/A      |
| <b>VAN-019</b> |          | <b>1</b>  | 30.82 | Negative | 18.51  | Negative |
| <b>VAN-019</b> |          | <b>2</b>  | 32.06 | Negative | 50.55  | Positive |
| <b>VAN-019</b> |          | <b>4</b>  | 31.12 | Negative | 278.87 | Positive |
| <b>VAN-019</b> |          | <b>8</b>  | 37.88 | Negative | 273.53 | Positive |
| <b>VAN-019</b> |          | <b>22</b> | 39.16 | Negative | 148.04 | Positive |
| <b>VAN-019</b> |          | <b>34</b> | 33.41 | Negative | 101.59 | Positive |
| <b>VAN-019</b> |          | <b>48</b> | 24.70 | Negative | 104.30 | Positive |
| <b>VAN-020</b> | <b>7</b> | <b>0</b>  | 19.56 | N/A      | <5     | Negative |
| <b>VAN-020</b> |          | <b>1</b>  | 21.48 | Negative | <5     | Negative |
| <b>VAN-020</b> |          | <b>2</b>  | 22.33 | Negative | 24.82  | Positive |
| <b>VAN-020</b> |          | <b>4</b>  | 22.52 | Negative | 148.16 | Positive |
| <b>VAN-020</b> |          | <b>8</b>  | 26.59 | Negative | 87.96  | Positive |
| <b>VAN-020</b> |          | <b>22</b> | 28.17 | Negative | 41.68  | Positive |
| <b>VAN-020</b> |          | <b>34</b> | 29.76 | Negative | 34.89  | Positive |
| <b>VAN-020</b> |          | <b>48</b> | 29.10 | Negative | 30.19  | Positive |
| <b>VAN-021</b> | <b>7</b> | <b>0</b>  | 23.26 | N/A      | 5.18   | N/A      |
| <b>VAN-021</b> |          | <b>1</b>  | 25.60 | Negative | 5.02   | Negative |
| <b>VAN-021</b> |          | <b>2</b>  | 21.05 | Negative | 6.53   | Negative |
| <b>VAN-021</b> |          | <b>4</b>  | 24.79 | Negative | 9.14   | Positive |
| <b>VAN-021</b> |          | <b>8</b>  | 26.19 | Negative | 7.01   | Negative |
| <b>VAN-021</b> |          | <b>22</b> | 26.41 | Negative | 7.23   | Negative |
| <b>VAN-021</b> |          | <b>34</b> | 25.84 | Negative | 7.09   | Negative |
| <b>VAN-021</b> |          | <b>48</b> | 30.55 | Negative | <5     | Negative |
| <b>VAN-022</b> | <b>8</b> | <b>0</b>  | 60.50 | N/A      | 25.25  | N/A      |
| <b>VAN-022</b> |          | <b>1</b>  | 56.15 | Negative | 22.57  | Negative |
| <b>VAN-022</b> |          | <b>2</b>  | 60.83 | Negative | 115.22 | Positive |
| <b>VAN-022</b> |          | <b>4</b>  | 63.04 | Negative | 481.99 | Positive |
| <b>VAN-022</b> |          | <b>8</b>  | 66.52 | Negative | 367.45 | Positive |
| <b>VAN-022</b> |          | <b>22</b> | 59.50 | Negative | 229.51 | Positive |
| <b>VAN-022</b> |          | <b>34</b> | 58.68 | Negative | 198.55 | Positive |
| <b>VAN-022</b> |          | <b>48</b> | 81.67 | Negative | 155.49 | Positive |
| <b>VAN-023</b> | <b>2</b> | <b>0</b>  | 16.15 | N/A      | <5     | N/A      |
| <b>VAN-023</b> |          | <b>2</b>  | 16.41 | Negative | <5     | Negative |
| <b>VAN-023</b> |          | <b>4</b>  | 15.68 | Negative | <5     | Negative |
| <b>VAN-023</b> |          | <b>5</b>  | 18.16 | Negative | <5     | Negative |



|                |          |           |        |          |        |          |
|----------------|----------|-----------|--------|----------|--------|----------|
| <b>VAN-023</b> |          | <b>8</b>  | 29.90  | Positive | 73.92  | Positive |
| <b>VAN-023</b> |          | <b>9</b>  | 153.87 | Positive | 84.42  | Positive |
| <b>VAN-023</b> |          | <b>12</b> | 89.75  | Positive | 80.31  | Positive |
| <b>VAN-023</b> |          | <b>24</b> | 27.82  | Positive | 51.90  | Positive |
| <b>VAN-024</b> | <b>7</b> | <b>0</b>  | 12.59  | N/A      | 5.58   | N/A      |
| <b>VAN-024</b> |          | <b>1</b>  | 12.96  | Negative | 5.60   | Negative |
| <b>VAN-024</b> |          | <b>2</b>  | 19.30  | Negative | 7.93   | Negative |
| <b>VAN-024</b> |          | <b>4</b>  | 24.94  | Positive | 52.00  | Positive |
| <b>VAN-024</b> |          | <b>8</b>  | 22.15  | Positive | 40.49  | Positive |
| <b>VAN-024</b> |          | <b>22</b> | 17.08  | Negative | 24.59  | Positive |
| <b>VAN-024</b> |          | <b>34</b> | 27.41  | Positive | 21.69  | Positive |
| <b>VAN-024</b> |          | <b>48</b> | 35.62  | Positive | 17.68  | Positive |
| <b>VAN-026</b> | <b>7</b> | <b>0</b>  | 15.22  | N/A      | <5     | N/A      |
| <b>VAN-026</b> |          | <b>1</b>  | 16.86  | Negative | <5     | Negative |
| <b>VAN-026</b> |          | <b>2</b>  | 17.69  | Negative | 12.81  | Positive |
| <b>VAN-026</b> |          | <b>4</b>  | 20.62  | Negative | 89.02  | Positive |
| <b>VAN-026</b> |          | <b>8</b>  | 22.80  | Negative | 61.33  | Positive |
| <b>VAN-026</b> |          | <b>22</b> | 16.04  | Negative | 29.47  | Positive |
| <b>VAN-026</b> |          | <b>34</b> | 19.13  | Negative | 27.18  | Positive |
| <b>VAN-026</b> |          | <b>48</b> | 22.12  | Negative | 22.00  | Positive |
| <b>VAN-029</b> | <b>5</b> | <b>0</b>  | 47.84  | N/A      | <5     | N/A      |
| <b>0011029</b> |          | <b>1</b>  | 43.48  | Negative | <5     | Negative |
| <b>0011029</b> |          | <b>2</b>  | 44.78  | Negative | <5     | Negative |
| <b>0011029</b> |          | <b>4</b>  | 45.29  | Negative | 6.77   | Negative |
| <b>0011029</b> |          | <b>16</b> | 50.59  | Negative | <5     | Negative |
| <b>VAN-031</b> | <b>4</b> | <b>0</b>  | 18.18  | N/A      | 9.57   | N/A      |
| <b>VAN-031</b> |          | <b>2</b>  | 18.69  | Negative | 48.68  | Positive |
| <b>VAN-031</b> |          | <b>4</b>  | 22.37  | Negative | 40.62  | Positive |
| <b>VAN-031</b> |          | <b>5</b>  | 129.69 | Positive | 99.15  | Positive |
| <b>VAN-031</b> |          | <b>8</b>  | 135.30 | Positive | 168.39 | Positive |
| <b>VAN-031</b> |          | <b>9</b>  | 139.82 | Positive | 175.58 | Positive |
| <b>VAN-031</b> |          | <b>12</b> | 164.86 | Positive | 182.18 | Positive |
| <b>VAN-031</b> |          | <b>24</b> | 190.61 | Positive | 128.02 | Positive |
| <b>VAN-034</b> | <b>6</b> | <b>0</b>  | 12.92  | N/A      | 18.21  | Negative |
| <b>VAN-034</b> |          | <b>1</b>  | 12.37  | Negative | 19.42  | Negative |
| <b>VAN-034</b> |          | <b>2</b>  | 14.52  | Negative | 33.10  | Positive |
| <b>VAN-034</b> |          | <b>4</b>  | 14.45  | Negative | 99.26  | Positive |
| <b>VAN-034</b> |          | <b>16</b> | 17.09  | Negative | 67.78  | Positive |

|                |          |           |        |          |        |          |
|----------------|----------|-----------|--------|----------|--------|----------|
| <b>VAN-801</b> | <b>5</b> | <b>0</b>  | 20.14  | N/A      | <5     | N/A      |
| <b>VAN-801</b> |          | <b>1</b>  | 20.88  | Negative | <5     | Negative |
| <b>VAN-801</b> |          | <b>2</b>  | 21.07  | Negative | <5     | Negative |
| <b>VAN-801</b> |          | <b>4</b>  | 26.59  | Negative | 24.94  | Positive |
| <b>VAN-801</b> |          | <b>16</b> | 27.37  | Negative | 11.68  | Positive |
| <b>VAN-802</b> | <b>5</b> | <b>0</b>  | 10.56  | N/A      | <5     | N/A      |
| <b>VAN-802</b> |          | <b>1</b>  | 10.88  | Negative | <5     | Negative |
| <b>VAN-802</b> |          | <b>2</b>  | 12.56  | Negative | <5     | Negative |
| <b>VAN-802</b> |          | <b>4</b>  | 15.93  | Negative | 43.80  | Positive |
| <b>VAN-802</b> |          | <b>16</b> | 13.62  | Negative | 9.77   | Positive |
| <b>VAN-803</b> | <b>3</b> | <b>0</b>  | 16.22  | N/A      | 8.65   | N/A      |
| <b>VAN-803</b> |          | <b>1</b>  | 17.27  | Negative | 8.81   | Negative |
| <b>VAN-803</b> |          | <b>2</b>  | 47.15  | Positive | 15.63  | Positive |
| <b>VAN-803</b> |          | <b>4</b>  | 38.14  | Positive | 178.03 | Positive |
| <b>VAN-803</b> |          | <b>16</b> | 35.89  | Positive | 159.01 | Positive |
| <b>VAN-804</b> | <b>3</b> | <b>0</b>  | 19.52  | N/A      | <5     | N/A      |
| <b>VAN-804</b> |          | <b>2</b>  | 17.66  | Negative | <5     | Negative |
| <b>VAN-804</b> |          | <b>4</b>  | 19.39  | Negative | <5     | Negative |
| <b>VAN-804</b> |          | <b>5</b>  | 172.93 | Positive | 114.02 | Positive |
| <b>VAN-804</b> |          | <b>8</b>  | 101.07 | Positive | 67.67  | Positive |
| <b>VAN-804</b> |          | <b>9</b>  | 129.44 | Positive | 60.26  | Positive |
| <b>VAN-804</b> |          | <b>12</b> | 79.42  | Positive | 60.00  | Positive |
| <b>VAN-804</b> |          | <b>16</b> | 28.90  | Negative | 15.35  | Positive |
| <b>VAN-805</b> | <b>6</b> | <b>0</b>  | 20.38  | N/A      | 6.10   | N/A      |
| <b>VAN-805</b> |          | <b>1</b>  | 54.37  | Positive | 6.25   | Negative |
| <b>VAN-805</b> |          | <b>2</b>  | 79.83  | Positive | 7.62   | Negative |
| <b>VAN-805</b> |          | <b>4</b>  | 52.94  | Positive | 45.27  | Positive |
| <b>VAN-805</b> |          | <b>16</b> | 48.85  | Positive | 17.45  | Positive |
| <b>VAN-806</b> | <b>5</b> | <b>0</b>  | 28.86  | N/A      | 23.80  | N/A      |
| <b>VAN-806</b> |          | <b>1</b>  | 27.11  | Negative | 21.90  | Negative |
| <b>VAN-806</b> |          | <b>2</b>  | 26.30  | Negative | 26.20  | Negative |
| <b>VAN-806</b> |          | <b>4</b>  | 27.70  | Negative | 43.41  | Positive |
| <b>VAN-806</b> |          | <b>16</b> | 38.27  | Negative | 28.14  | Negative |
| <b>VAN-807</b> | <b>3</b> | <b>0</b>  | 21.23  | N/A      | 14.61  | N/A      |
| <b>VAN-807</b> |          | <b>2</b>  | 25.78  | Negative | 566.83 | Positive |
| <b>VAN-807</b> |          | <b>4</b>  | 29.56  | Negative | 371.77 | Positive |
| <b>VAN-807</b> |          | <b>5</b>  | 53.98  | Positive | 323.16 | Positive |
| <b>VAN-807</b> |          | <b>8</b>  | 49.21  | Positive | 228.06 | Positive |

|         |   |    |        |          |        |          |
|---------|---|----|--------|----------|--------|----------|
| VAN-807 |   | 9  | 59.70  | Positive | 234.70 | Positive |
| VAN-807 |   | 12 | 56.67  | Positive | 194.89 | Positive |
| VAN-807 |   | 24 | 30.49  | Negative | 119.19 | Positive |
| VAN-808 | 6 | 0  | 13.35  | N/A      | <5     | N/A      |
| VAN-808 |   | 1  | 13.78  | Negative | <5     | Negative |
| VAN-808 |   | 2  | 16.92  | Negative | 146.12 | Positive |
| VAN-808 |   | 4  | 18.51  | Negative | 176.13 | Positive |
| VAN-808 |   | 16 | 15.70  | Negative | 70.89  | Positive |
| VAN-809 | 5 | 0  | 12.51  | N/A      | <5     | N/A      |
| VAN-809 |   | 1  | 12.51  | Negative | <5     | Negative |
| VAN-809 |   | 2  | 15.01  | Negative | 45.41  | Positive |
| VAN-809 |   | 16 | 15.26  | Negative | 152.17 | Positive |
| VAN-810 | 5 | 0  | 17.89  | N/A      | 13.71  | N/A      |
| VAN-810 |   | 1  | 75.86  | Positive | 14.13  | Negative |
| VAN-810 |   | 2  | 126.60 | Positive | 45.36  | Positive |
| VAN-810 |   | 4  | 114.48 | Positive | 166.36 | Positive |
| VAN-811 | 1 | 0  | 6.26   | N/A      | <5     | N/A      |
| VAN-811 |   | 2  | 6.53   | Negative | <5     | Negative |
| VAN-811 |   | 4  | 6.71   | Negative | <5     | Negative |
| VAN-811 |   | 5  | 6.93   | Negative | <5     | Negative |
| VAN-811 |   | 8  | 6.79   | Negative | <5     | Negative |
| VAN-811 |   | 9  | 8.30   | Negative | 6.64   | Negative |
| VAN-811 |   | 12 | 7.64   | Negative | 5.02   | Negative |
| VAN-811 |   | 24 | 10.47  | Positive | <5     | Negative |
| VAN-812 | 5 | 0  | 16.65  | N/A      | 5.48   | N/A      |
| VAN-812 |   | 1  | 17.37  | Negative | 5.76   | Negative |
| VAN-812 |   | 2  | 19.16  | Negative | 24.14  | Positive |
| VAN-812 |   | 4  | 17.27  | Negative | 56.34  | Positive |
| VAN-812 |   | 16 | 42.10  | Positive | 28.76  | Positive |
| VAN-813 | 6 | 0  | 34.15  | N/A      | <5     | N/A      |
| VAN-813 |   | 1  | 34.33  | Negative | <5     | Negative |
| VAN-813 |   | 2  | 37.25  | Negative | <5     | Negative |
| VAN-813 |   | 4  | 63.52  | Positive | 28.08  | Positive |
| VAN-813 |   | 16 | 54.13  | Positive | 9.78   | Positive |
| VAN-814 | 6 | 0  | 24.24  | N/A      | <5     | N/A      |
| VAN-814 |   | 1  | 29.41  | Negative | <5     | Negative |
| VAN-814 |   | 2  | 29.78  | Negative | <5     | Negative |
| VAN-814 |   | 4  | 29.22  | Negative | 11.03  | Positive |

|                |  |           |       |          |      |          |
|----------------|--|-----------|-------|----------|------|----------|
| <b>VAN-814</b> |  | <b>16</b> | 29.42 | Negative | 6.18 | Negative |
|----------------|--|-----------|-------|----------|------|----------|

**Table S4.** *Ex vivo* IFN- $\gamma$  ELISpot results on frozen PBMCs depleted of CD4+ or CD8+ T

| Group | Patient ID | Frozen PBMCs                       |                                           |                                           | Fresh PBMCs                        |
|-------|------------|------------------------------------|-------------------------------------------|-------------------------------------------|------------------------------------|
|       |            | Whole PBMCs (SFCx10 <sup>6</sup> ) | CD4 depleted PBMCs (SFCx10 <sup>6</sup> ) | CD8 depleted PBMCs (SFCx10 <sup>6</sup> ) | Whole PBMCs (SFCx10 <sup>6</sup> ) |
| 2     | VAN-003    | 0                                  | 0                                         | 0                                         | 88                                 |
| 2     | VAN-802    | 166                                | 43                                        | 127                                       | 253                                |
| 3     | VAN-011    | 0                                  | 0                                         | 0                                         | 152                                |
| 4     | VAN-031    | 0                                  | 0                                         | 0                                         | 132                                |
| 5     | VAN-029    | 59                                 | 0                                         | 91                                        | 308                                |
| 5     | VAN-801    | 0                                  | 0                                         | 0                                         | 0                                  |
| 5     | VAN-812    | 101                                | 97                                        | 0                                         | 151                                |
| 6     | VAN-808    | 75                                 | 100                                       | 0                                         | 224                                |
| 7     | VAN-007    | 0                                  | 0                                         | 0                                         | 181                                |

cells.

**Table S5.** T cell density in the prostate gland of vaccinated surgical patients measured by IHC. SD = standard deviation.

| Patient ID | Immune cell infiltration in surgical specimens<br>(number of positive cells per 1 mm <sup>2</sup> ) |      |
|------------|-----------------------------------------------------------------------------------------------------|------|
|            | CD3+                                                                                                | CD8+ |
| VAN-001    | 89                                                                                                  | 46   |
| VAN-003    | 291                                                                                                 | 170  |
| VAN-004    | 241                                                                                                 | 164  |
| VAN-005    | 174                                                                                                 | 138  |
| VAN-008    | 232                                                                                                 | 163  |
| VAN-010    | 203                                                                                                 | 155  |
| VAN-011    | 187                                                                                                 | 161  |

|             |     |     |
|-------------|-----|-----|
| VAN-012     | 317 | 138 |
| VAN-023     | 210 | 82  |
| VAN-029     | 186 | 137 |
| VAN-031     | 61  | 50  |
| VAN-034     | 157 | 116 |
| <b>Mean</b> | 196 | 127 |
| <b>SD</b>   | 73  | 44  |
